# Supplementary material for: Antibacterial bioadhesive layer-by-layer coatings for orthopedic applications
Source: Royal Society of Chemistry journal article supplement (doi:10.1039/c6tb00841k), 2016-01-01
Supplement: c6tb00841k1.pdf [file c6tb00841k1.pdf]

## Antibacterial bioadhesive LbL coatings for orthopedic applications

Ana L. Carvalho<sup>a,b</sup>, Ana C. Vale<sup>a,b</sup>, Maria P. Sousa<sup>a,b</sup>, Ana M. Barbosa<sup>b,c</sup>, Egídio Torrado<sup>b,c</sup>, João F. Mano<sup>a,b</sup>,

Nátalia M. Alves<sup>a,b</sup>

<sup>a</sup> 3B's Research Group – Biomaterials, Biodegradables and Biomimetics, University of Minho, Headquarters of the European Institute of Excellence on Tissue Engineering and Regenerative Medicine, AvePark, 4805-017 Barco, Guimarães, Portugal.

<sup>b</sup> ICVS/3B's PT Associate Laboratory, Guimarães, Portugal.

<sup>c</sup> Life and Health Sciences Research Institute (ICVS), School of Health Sciences, University of Minho, Braga, Portugal

### Modeling of QCM-D data

According to Voinova and co-workers<sup>26</sup>, the changes in the resonant frequency and in the dissipation factor, were determined with the eqn.(S1) and eqn. (S2), respectively:

$$\Delta f(\text{Hz}) \approx -\left(1/2\pi\rho_0 h_0\right)\left(\eta_B/\delta_B\right) + h_L \rho_L \omega - 2h_L \left(\eta_B/\delta_B\right)^2 \left(\eta_L \omega^2 / \omega^2 \eta_L^2\right) \quad (\text{S1})$$

$$\Delta D(\times 10^{-6}) \approx -\left(1/\pi_f \rho_0 h_0\right)\left(\eta_B/\delta_B\right) + 2h_L \left(\eta_B/\delta_B\right)^2 \left(\eta_L \omega / 2\omega^2 \eta_L^2\right) \quad (\text{S2})$$

where  $\omega$  is the angular frequency of the oscillation, and  $\rho_0$  and  $h_0$  are the density and thickness of the crystal, respectively. The viscosity of the bulk liquid is  $\eta_B$ ,  $\delta_B (=2(\eta_B/\rho_B\omega)1/2)$  is the viscous penetration depth of the shear wave in the bulk liquid and  $\rho_B$  is the liquid's density. The thickness, density, viscosity and elastic shear modulus of the adsorbed layer are represented by  $h_L$ ,  $\rho_L$ ,  $\eta_L$  and  $\mu_L$ , respectively.

### Surface characterization.

Atomic force microscopy imaging was performed to study the topography of the antibacterial nanostructured films, in air and at room temperature, using a Multimode STM microscopy controlled by the NanoScope III from Digital Instruments system. Several images were obtained in different areas on each scanned sample ( $5 \times 5 \mu\text{m}^2$ ), using a silicon probe (TESP, Bruker) in tapping mode at a frequency of 1 Hz.

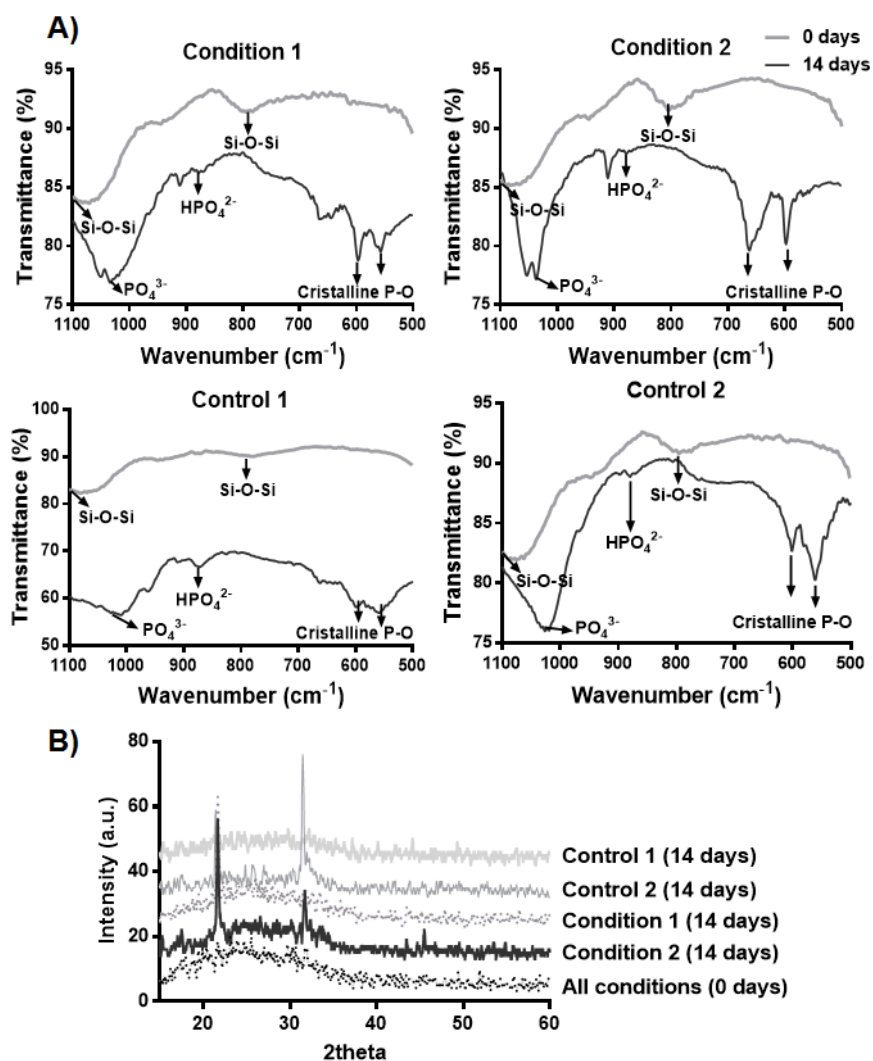

**Fig. S1.** *In vitro* bioactivity studies: A) FTIR spectra obtained before and after the immersion in SBF for 14 days for the distinct film configurations (condition 1:[CHT/HA-DN/CHT/AgBG]<sub>5</sub>+CHT/HA-DN), condition 2:[CHT/HA-DN/CHT/AgBG]<sub>5</sub>, control 1, [CHT/HA/CHT/AgBG]<sub>5</sub>+[CHT/HA], control 2: [CHT/HA/CHT/AgBG]<sub>5</sub>); and respective B) XRD diffractograms obtained before and after 14 days of SBF immersion.

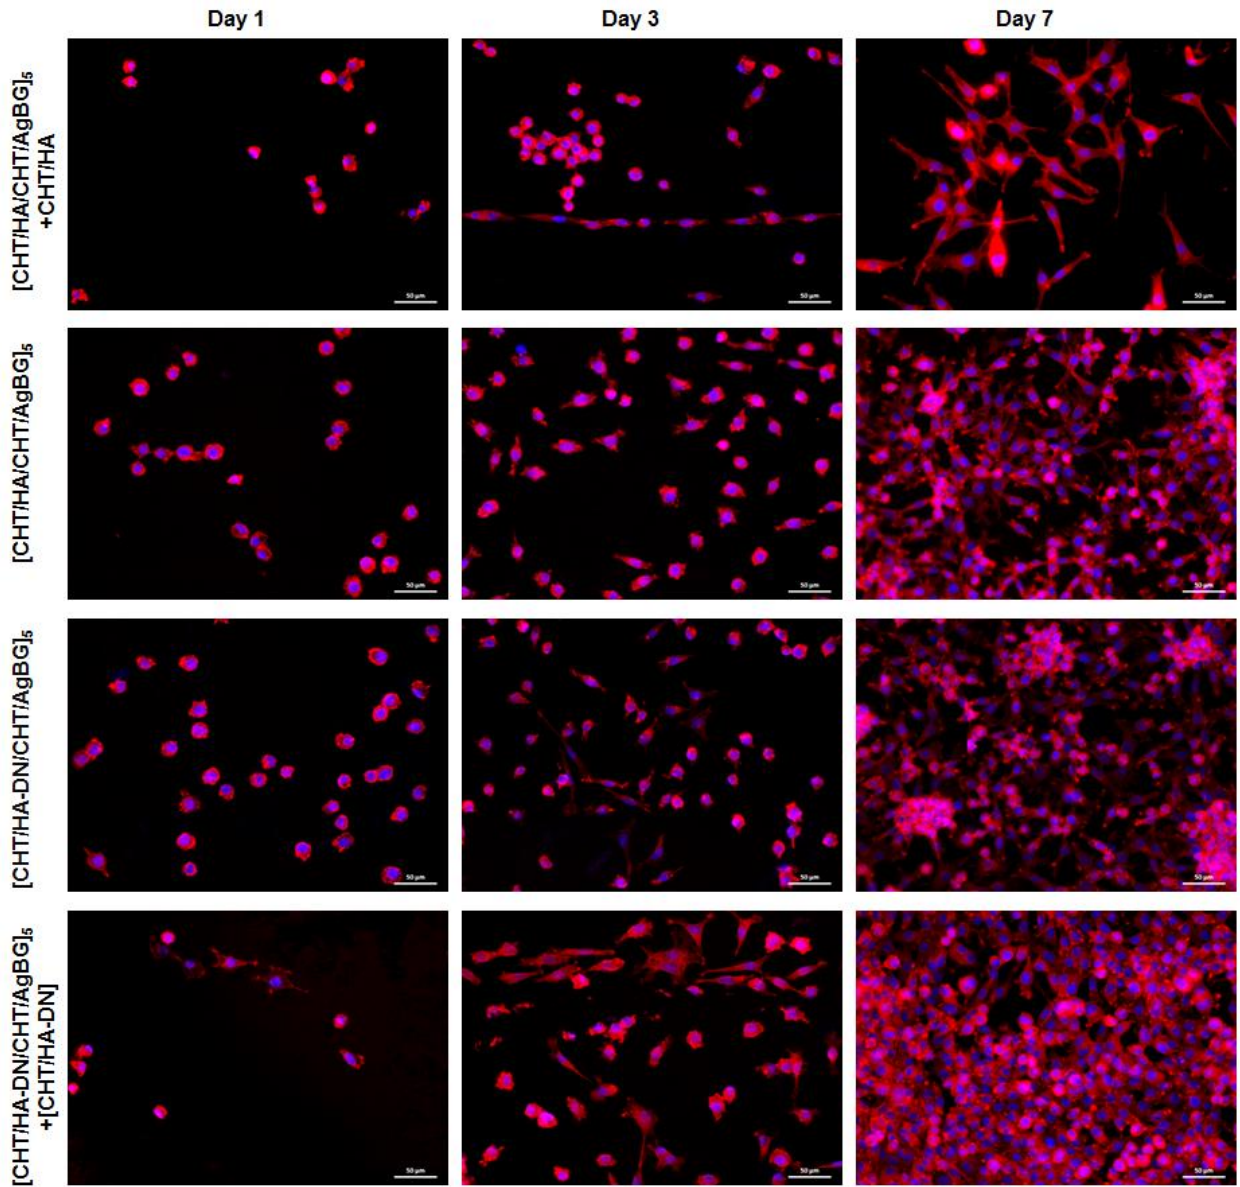

**Fig. S2.** Fluorescence images of cells stained with DAPI (blue) and phalloidin (red) for L929 at 1, 3 and 7 days of culture above the different multilayer coatings (condition 1:[CHT/HA-DN/CHT/AgBG]<sub>5</sub>+CHT/HA-DN), condition 2:[CHT/HA-DN/CHT/AgBG]<sub>5</sub>, control 1, [CHT/HA/CHT/AgBG]<sub>5</sub>+ [CHT/HA], control 2: [CHT/HA/CHT/AgBG]<sub>5</sub>): the nuclei of the cells was stained with blue and cytoskeleton of the cells with red. All images are representative for each condition and time point. Scale bar represents 50  $\mu$ m.

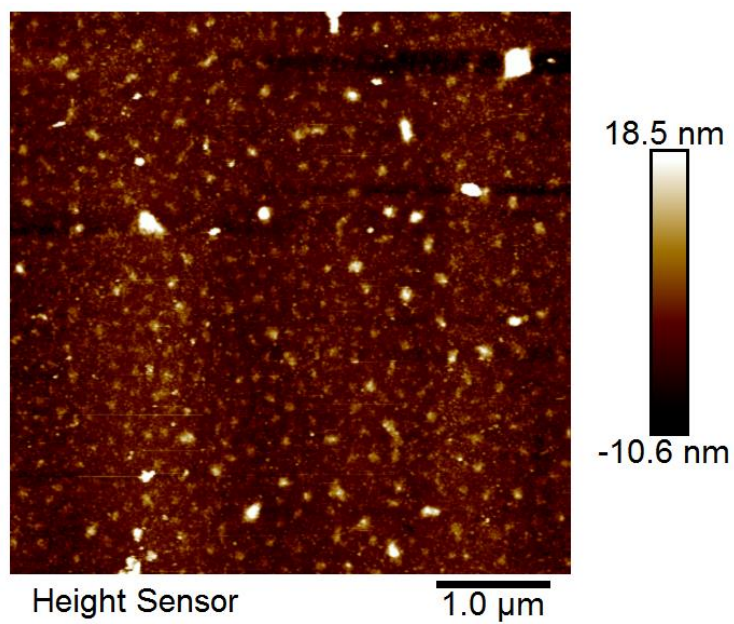

**Fig. S3** Representative image of atomic force microscopy of LbL film configuration - condition 1 ([CHT/HA-DN/CHT/AgBG]<sub>5</sub>+CHT/HA-DN). Scanned area of 5x5μm<sup>2</sup>, using a silicon probe (TESP, Bruker) in tapping mode at a frequency of 1Hz.
